# Supplementary material for: High quality β-FeOOH nanostructures constructed by a biomolecule-assisted hydrothermal approach and their pH-responsive drug delivery behaviors
Source: Royal Society of Chemistry journal article supplement (doi:10.1039/c5ce00559k), 2015-01-01
Supplement: c5ce00559k1.pdf [file c5ce00559k1.pdf]

*Electronic Supplementary Information for:*

## High Quality $\beta$ -FeOOH Nanostructures Constructed from Biomolecule-assisted Hydrothermal Approach and Their pH-responsive Drug Delivery Behaviors

Xinyu Zhang,<sup>#a</sup> Juan Ge,<sup>#a</sup> Bo Lei,<sup>\*a</sup> Yumeng Xue,<sup>a</sup> and Yaping Du,<sup>\*a</sup>

### Experimental Section

#### Materials

Ferric chloride hydrates ( $\text{FeCl}_3 \cdot 6\text{H}_2\text{O}$ , 99.5 %, Tianjin Zhiyuan Chemical Company), Gelatin ( $\text{C}_{102}\text{H}_{151}\text{N}_{31}\text{O}_{39}$ , G7041-500G 99.0 % Sigma-Aldrich), other type Gelatin (G2500-500G 99.0 % Sigma-Aldrich), Urea ( $\text{CO}(\text{NH}_2)_2$ , 99.9 % Sigma-Aldrich), and Ethanol ( $\text{C}_2\text{H}_6\text{O}$ , > 99.7 %) were used as received without further purification.

#### Synthesis of FeOOH1 Nanostructures

A typical synthetic procedure for **FeOOH1** was described: First, 10 mL of pure water containing 27.0 g (100 mmol) of  $\text{FeCl}_3 \cdot 6\text{H}_2\text{O}$  were added into a 100 mL round-bottom flask with vigorous magnetic stirring at room temperature for ~45 min. Then, another 9 mL of pure water containing 1.0 g of gelatin were added into a centrifuge tube, which was heated in an electric oven at 80 °C for 20 min formed transparent solution to inject into the  $\text{FeCl}_3 \cdot 6\text{H}_2\text{O}$  system stirring at room temperature for ~30 min. After that, 6.0 g (100 mmol) of urea was dissolved in the  $\text{FeCl}_3$ /gelatin mixture stirring at room temperature for ~30 min, subsequently; elevating the temperature to 80 °C and reaction lasted for 21 h. After it cooling down to room temperature, the as-formed **FeOOH1** were collected by centrifugation at 8000 rpm and washed with ethanol for several times, and then dried in a vacuum at 60 °C overnight. **FeOOH2** nanostructures synthetic procedure was similar to **FeOOH1** except urea was not joined into the reaction system. **FeOOH3** nanostructures synthetic procedure was similar to **FeOOH1** except the increase of the urea to 300 mmol and prolonging the reaction time for 46 h.

**Characterization.** Powder X-ray diffraction (XRD) patterns of the dried powders were recorded on Rikuo D/MAX-RB (Japan) at a scanning rate of  $2^\circ \text{ min}^{-1}$  from  $10^\circ$  to  $80^\circ$ , using Cu K $\alpha$  radiation ( $\lambda = 1.5406 \text{ \AA}$ ). The lattice parameters were calculated with the least-squares method. The transmission electron microscopy (TEM) analysis was performed with a Hitachi HT-7700 (Japan) transmission electron microscope operating at 100 kV. Selected area electron diffraction (SAED) and scanning transmission electron microscopy (STEM) characterizations were performed with a Fei Tecnai G<sup>2</sup> F20S-Twin (USA) operated at 200 kV. The UV-vis absorption spectra of the  $\beta$ -FeOOH nanostructures

were obtained on a Lambda 35 UV-vis Spectrometer at room temperature (Japan). The Fourier transforms infrared absorption (FTIR) spectra of the  $\beta$ -FeOOH nanostructures were carried on NICOLET 6700 FT-IR (USA). The zeta potentials of  $\beta$ -FeOOH nanostructures were recorded by the Beckman Coulter delsa nano particle analyzer system (USA). Nitrogen adsorption-desorption isotherms were recorded on a Micrometrics TriStar 3000 porosimeter (mesoporous characterization) and Micrometrics ASAP 2020 microporous characterization) at 77 K. All  $\beta$ -FeOOH samples were outgassed at 160 °C for 6 h under the vacuum state prior to measurements. The specific surface areas were calculated based on the Brunauer-Emmett-Teller (BET) method. X-ray Photoelectron Spectra were obtained using a Escalab 250 xi photoelectron spectrometer using Al K radiation (15 kV, 225 W, base pressure  $\approx 5 \times 10^{-10}$  Torr).

### **Anti-cancer Drug Loading**

5-fluorouracil (5-Fu) (Sigma), as an anti-cancer drug, was loaded in  $\beta$ -FeOOH nanostructures. Briefly, 5-Fu was dissolved in deionized water to obtain a 10 mg/mL drug solution. 50 mg of  $\beta$ -FeOOH samples were soaked in 5-Fu solution for 24 h at 37 °C. After that, the  $\beta$ -FeOOH samples with drugs were obtained by centrifugation and washing. The drug loading efficiency (DLE) was calculated by the following formula:  $\text{DLE \%} = ((\text{weight of drug in feed} - \text{weight of drug in medium after loading}) / \text{weight of drug in feed}) \times 100 \%$ . The weights of drug before and after loading were determined by UV-vis analysis.

### **Evaluation of pH-controlled Release**

In vitro pH-controlled releases of  $\beta$ -FeOOH nanostructures were carried out at 37 °C in PBS of pH 7.4 and acetic buffer solutions (ABS) of pH 4.0. At pre-determined time points, the release medium containing samples was centrifuged and 1 mL solution was taken out for further analysis. Then the fresh medium with the same volume was added into release solution. The drug concentrations and accumulated release was determined using UV-vis spectrophotometer (Lambda 35 UV-Vis) by measuring the maximum absorbance wavelengths at 266 nm.

### **Cell Culture**

Fibroblasts (L929 cells) line and human liver hepatocellular carcinoma cell line (HepG2 cells) was employed to study the cytotoxicity of as-prepared  $\beta$ -FeOOH nanostructures and anticancer ability of 5-Fu loaded  $\beta$ -FeOOH nanostructures respectively. The L929 and HepG2 cells were provided by the State Key Laboratory for Manufacturing Systems Engineering, Xi'an Jiaotong University. Cells were incubated at 37 °C in a humidified atmosphere containing 5 % CO<sub>2</sub>. The complete growth medium was Dulbecco's Modified Eagle Medium (DMEM, GIBCO) supplemented with 10 % fetal bovine serum (FBS, GIBCO),  $1.0 \times 10^5$  U/L penicillin (Hyclone) and 100 mg/L streptomycin (Hyclone).

## Cytotoxicity Assessment

The cytotoxicity of  $\beta$ -FeOOH nanostructures against L929 cells was determined by an AlamarBlue kit (Invitrogen, USA). L929 with a concentration of  $5.0 \times 10^4$  per mL was seeded in 96-well plate. After culture for 24 h, the culture medium for L929 was changed into growth medium containing  $\beta$ -FeOOH nanostructures at different concentrations (25  $\mu\text{g/mL}$ , 50  $\mu\text{g/mL}$ , 100  $\mu\text{g/mL}$ , 200  $\mu\text{g/mL}$ , 400  $\mu\text{g/mL}$ , and 800  $\mu\text{g/mL}$ ). At predetermined time intervals (24 h and 72 h), the culture medium was replaced by 100  $\mu\text{L}$  growth medium containing 10  $\mu\text{L}$  of the AlamarBlue® reagent. After incubation for another 5 h, the fluorescence intensity related as cell viability was tested at 560/600 nm by a microplate reader (Molecular Devices). Cells cultured on tissue culture plate (TCP) without nanomaterials treating were used as the positive control which was conceded as 100 % of cell viability. Six species for each group were tested.

## Anticancer Ability Investigation

The anticancer ability of 5-Fu loaded  $\beta$ -FeOOH nanostructures against HepG2 cells was also evaluated by the alamarblue assay as described. 100  $\mu\text{L}$  of medium containing 5000 HepG2 cells was added in a 96-well plate. After 24 h, the culture medium was changed into growth medium containing  $\beta$ -FeOOH nanostructures and 5-Fu loaded  $\beta$ -FeOOH nanostructures at different concentrations (25  $\mu\text{g/mL}$ , 50  $\mu\text{g/mL}$ , 100  $\mu\text{g/mL}$ , 200  $\mu\text{g/mL}$ , 400  $\mu\text{g/mL}$ , 800  $\mu\text{g/mL}$ ) respectively. Cells cultured on tissue culture plate (TCP) without nanomaterials and pure 5-Fu at different concentrations served as the negative and positive control. Six species for each group were tested.

## Cellular Uptake of $\beta$ -FeOOH Nanostructures

Pure  $\beta$ -FeOOH nanoparticles do not show any fluorescent properties. Therefore, to observe the cellular uptake of  $\beta$ -FeOOH nanostructures, samples were stained by Nile red dye. Briefly, 10 mg of  $\beta$ -FeOOH nanostructures were immersed into a certain concentration of Nile red solution for several hours, then collected by centrifugation at 8000 rpm and washed with ethanol and water for several times, then dried in a vacuum for 2 h. Cells were seeded on sterile glass coverslips at the density of 5000 cells/ $\text{cm}^2$ . After 12 h of incubation, the cells were treated with Nile red loaded  $\beta$ -FeOOH nanostructures (50  $\mu\text{g/mL}$ ) for 4 h. The fluorescence images were observed under the confocal microscope (Olympus).

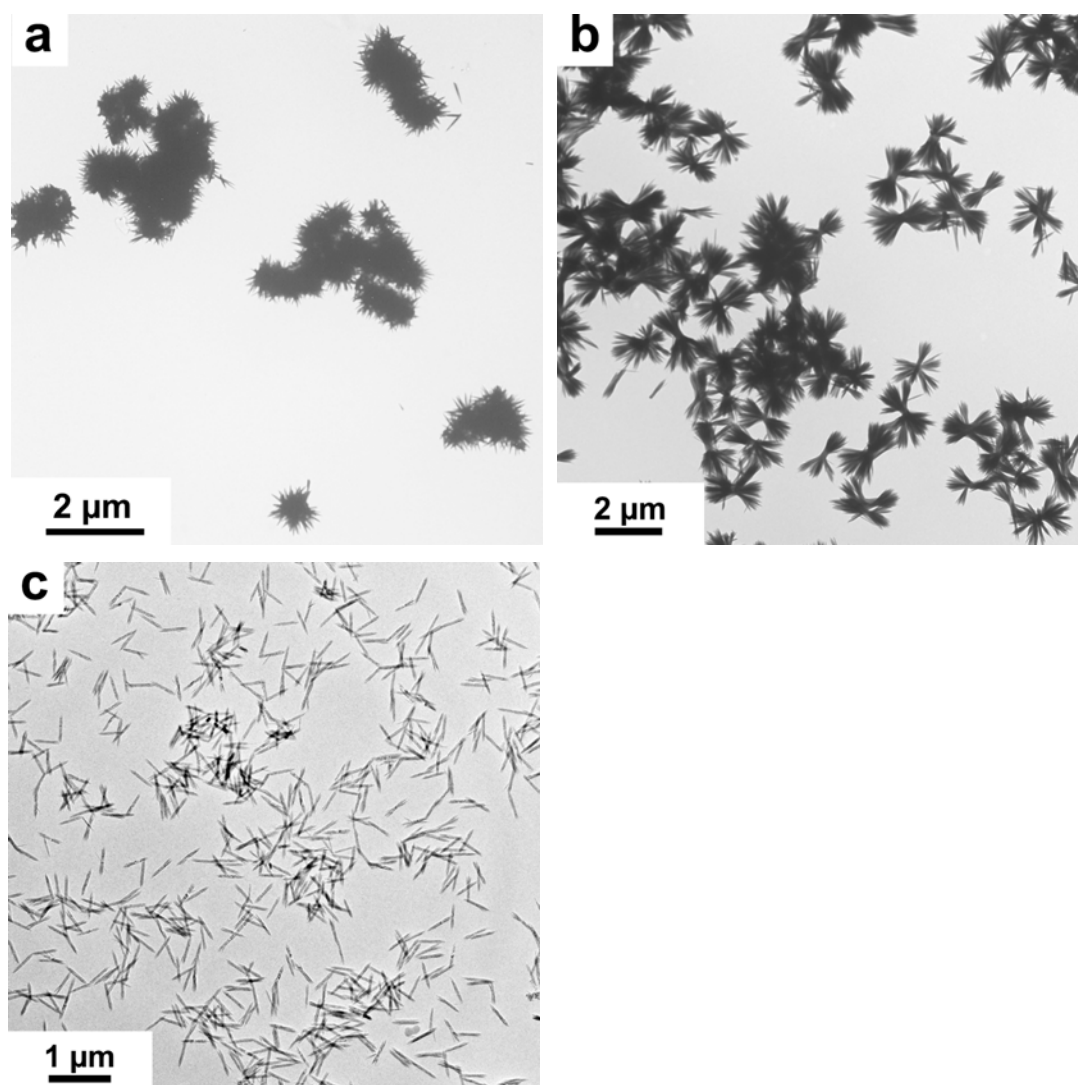

**Figure S1.** Low magnified TEM images of as-obtained (a) **FeOOH1**, (b) **FeOOH2** and (c) **FeOOH3** nanostructure.

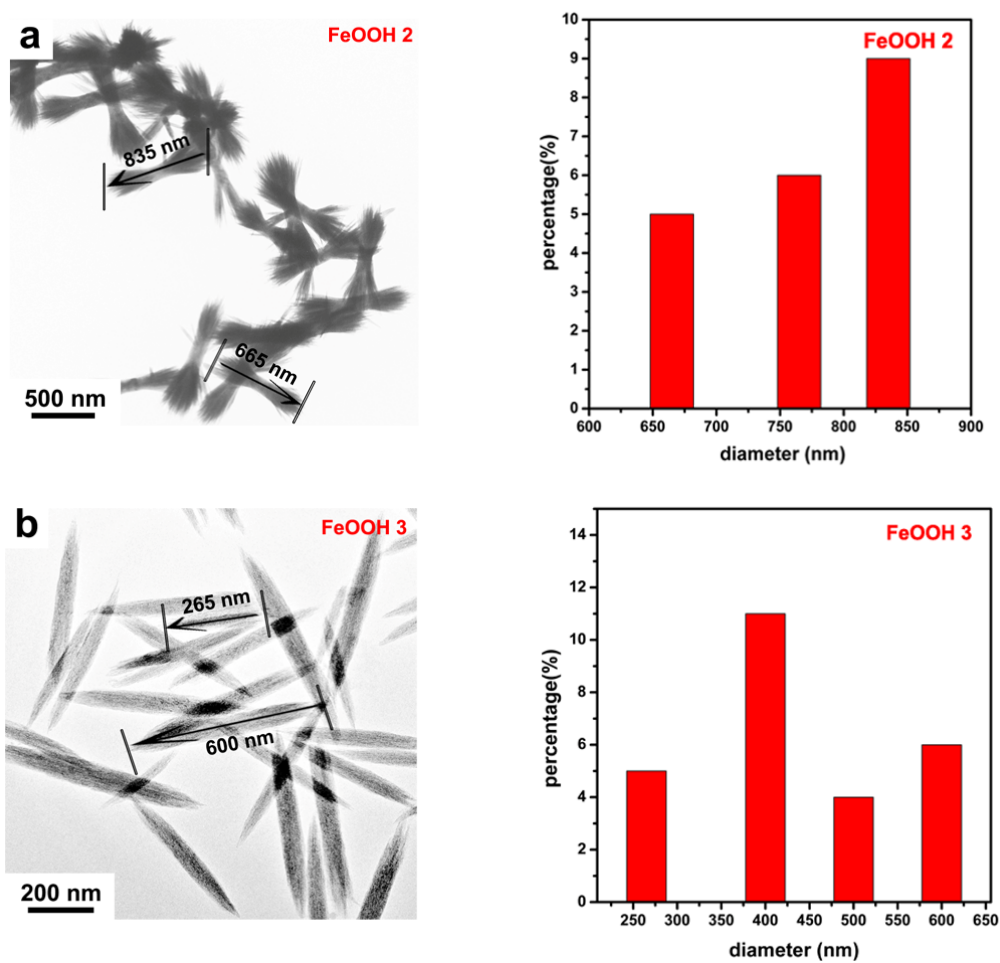

**Figure S2.** TEM images and size distribution of the as-obtained (a) **FeOOH<sub>2</sub>** and (b) **FeOOH<sub>3</sub>** nanostructures.

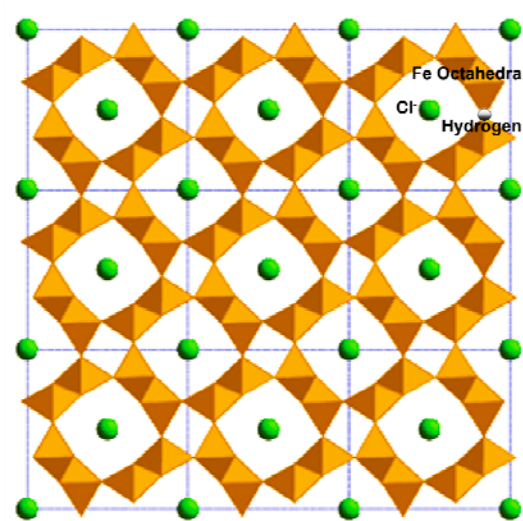

**Figure S3.** Structural model of akaganeite. The unit cell consists of  $\text{FeO}_3(\text{OH})_3$  octahedra forming a double ring structure, and there is cavity with a diameter of 0.5 nm (where it is normally for  $\text{Cl}^-$  to incorporate). The akaganeite has a structure in which four double chains of  $\text{FeO}_3(\text{OH})_3$  octahedral form a  $0.5 \text{ nm} \times 0.5 \text{ nm}$  tunnel running along  $[010]$ . The tunnel is partly occupied by chloride anions, which substitute for hydroxide and are suggested to play an vital role in stabilizing the structure.

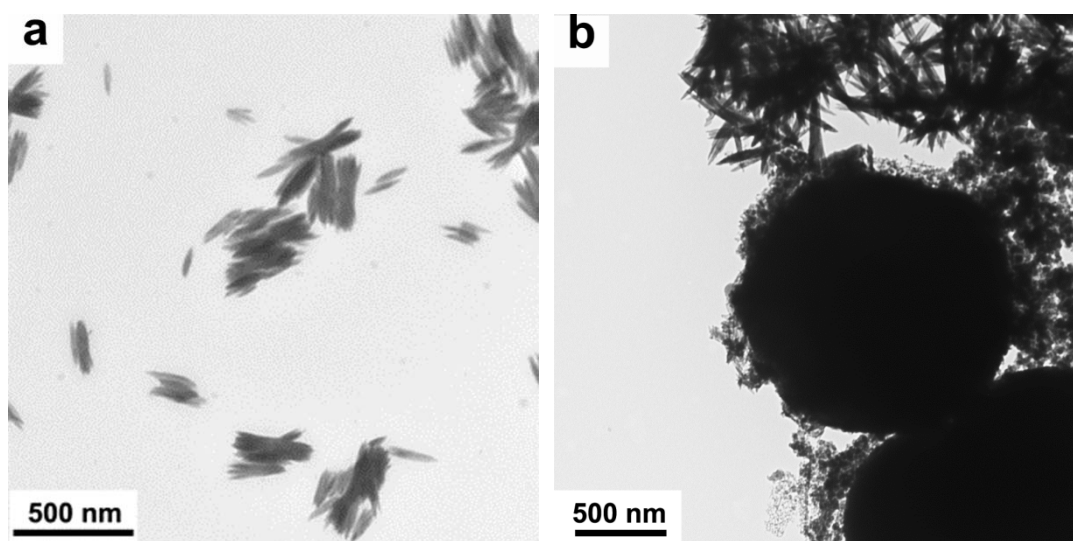

**Figure S4.** TEM images of the obtained **FeOOH1** *via* different concentration of  $\text{FeCl}_3 \cdot 6\text{H}_2\text{O}$  with 1.0 g gelatin, 100 mmol urea at 80 °C for 21 h: (a) 10 mmol, (b) 1mol.

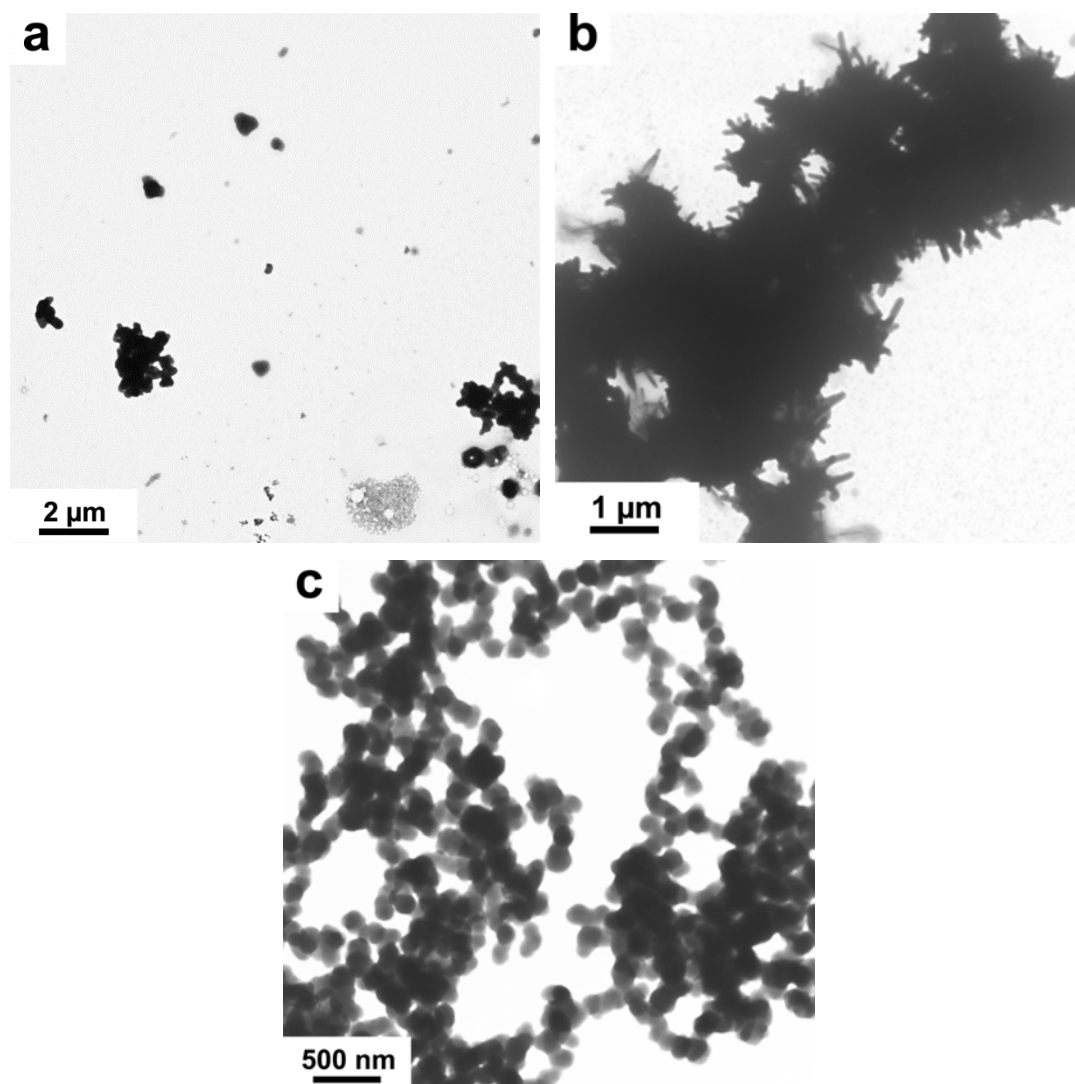

**Figure S5.** TEM images of the obtained **FeOOH1** *via* hydrothermal reaction of 100 mmol  $\text{FeCl}_3 \cdot 6\text{H}_2\text{O}$  and 100 mmol urea under different surfactants at 80 °C for 21 h: (a) no gelatin, (b) 5 g gelatin, (c) other types of gelatin (G2500-500G).



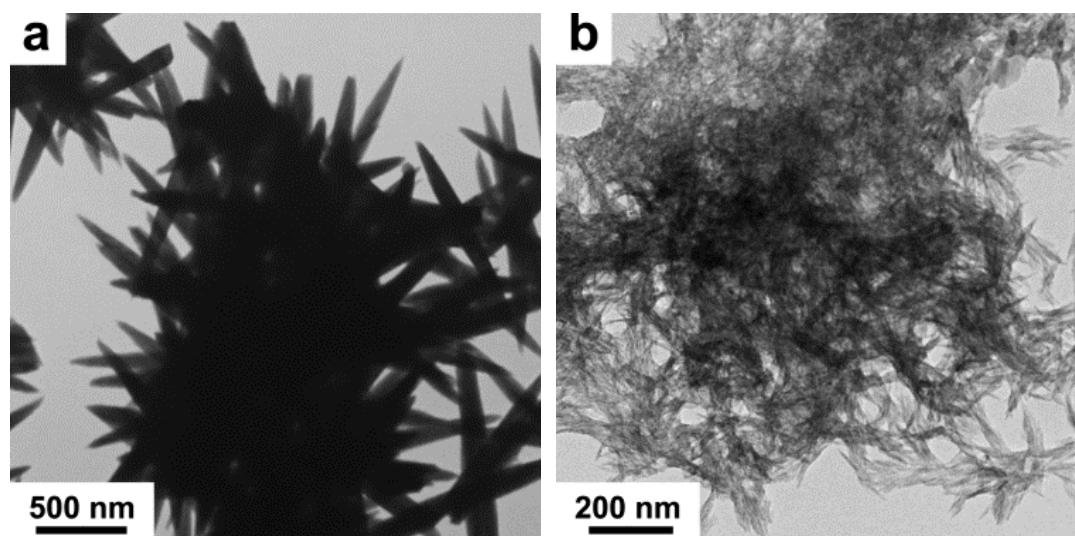

**Figure S6.** TEM images of the obtained **FeOOH1** *via* hydrothermal reaction of 100 mmol  $\text{FeCl}_3 \cdot 6\text{H}_2\text{O}$ , 1.0 g gelatin and 100mmol urea at different temperatures for 21 h: (a) 120 °C, (b) 40 °C.

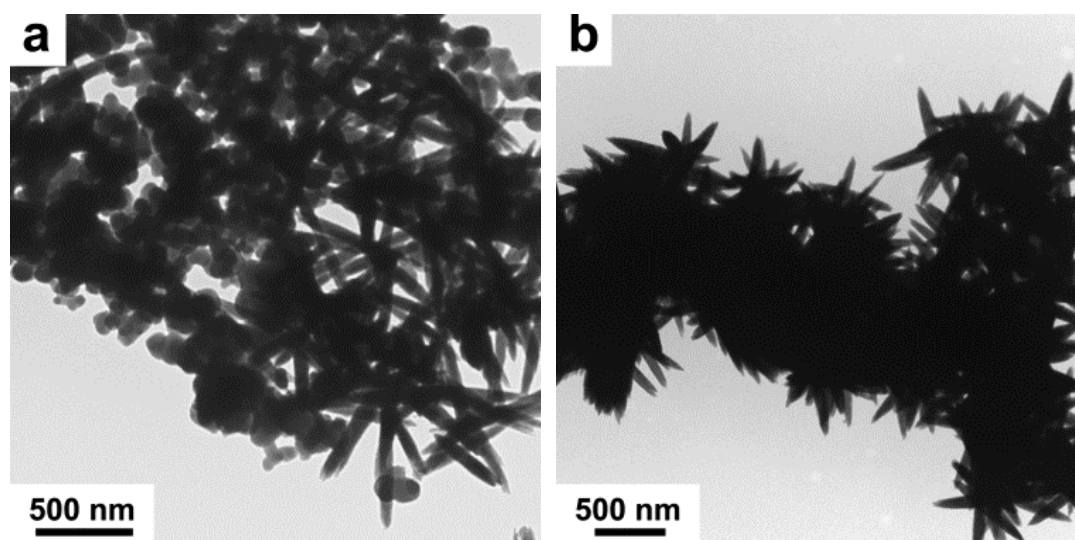

**Figure S7.** TEM images of the obtained **FeOOH1** *via* hydrothermal reaction of 100 mmol  $\text{FeCl}_3 \cdot 6\text{H}_2\text{O}$ , 1.0 g gelatin and 100 mmol urea at 80 °C with different time: (a) 10 h, (b) 50 h.

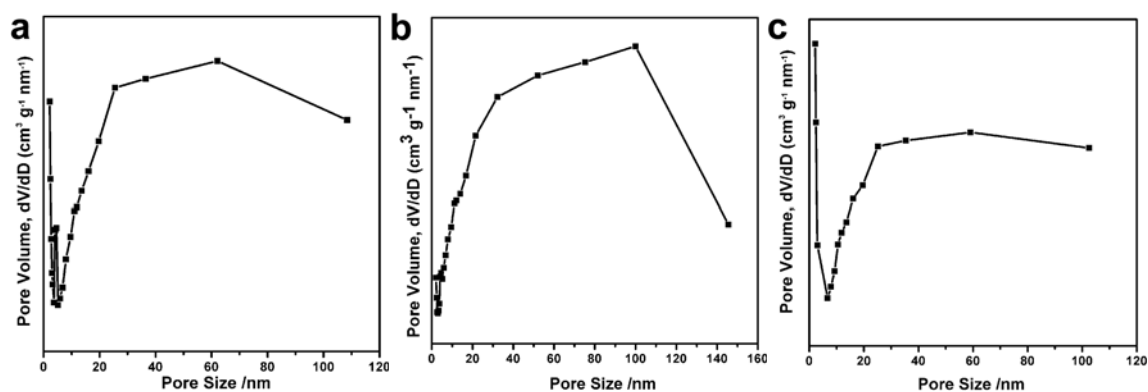

**Figure S8.** BJH pore size distribution curves of (a) **FeOOH 1** (b) **FeOOH 2** and (c) **FeOOH3** nanostructures.

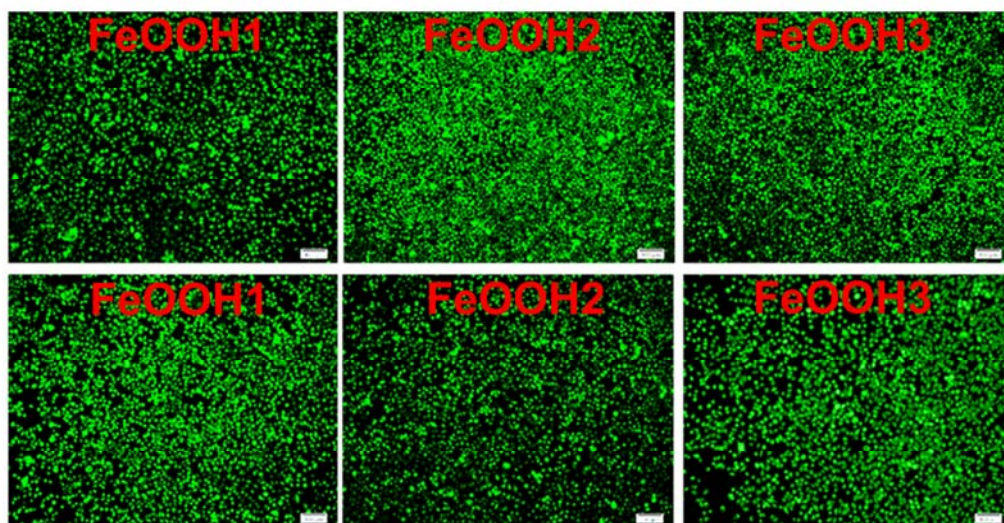

**Figure S9.** Live cell morphology after incubation with nanostructures at 100  $\mu\text{g/mL}$ .

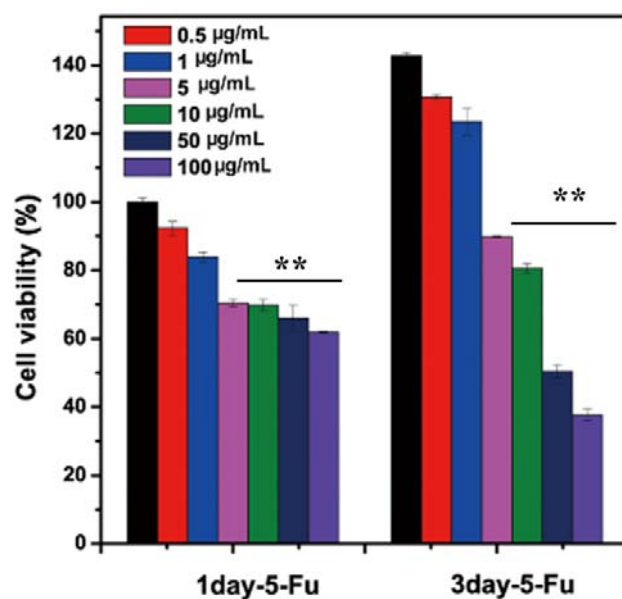

**Figure S10.** Cancer cell viability after incubation with pure 5-Fu at different concentrations.

\*\*p<0.01 represents the significant difference relative to the cell viability at low 5-Fu concentrations.

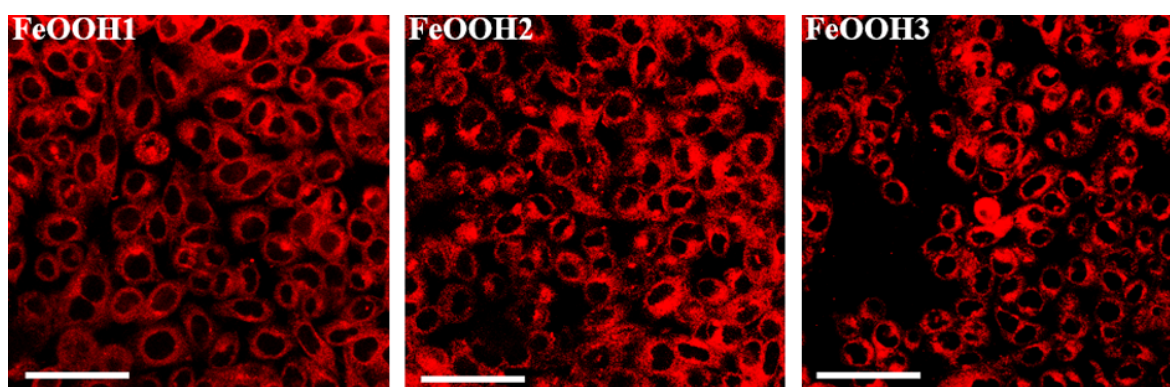

**Figure S11.** Cellular uptake study of  $\beta$ -FeOOH nanostructures. Fluorescent images of HepG2 cells after incubated with Nile red-loaded  $\beta$ -FeOOH nanostructures. Scale bar = 100  $\mu$ m.

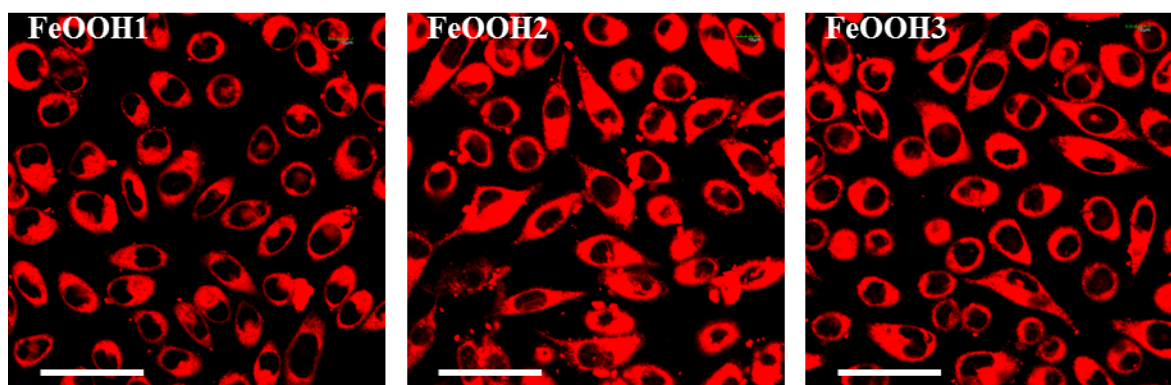

**Figure S12.** L929 cellular uptake study of  $\beta$ -FeOOH nanostructures. Fluorescent images of cells after incubated with Nile red-loaded  $\beta$ -FeOOH nanostructures. Scale bar= 100  $\mu$ m.
